# Supplementary material for: Ultrasonic-Assisted Decoloration of Polysaccharides from Seedless Chestnut Rose (Rosa sterilis) Fruit: Insight into the Impact of Different Macroporous Resins on Its Structural Characterization and In Vitro Hypoglycemic Activity
Source: MDPI journal article supplement (doi:10.3390/foods13091349), 2024-04-27
Supplement: s1 [file s1]

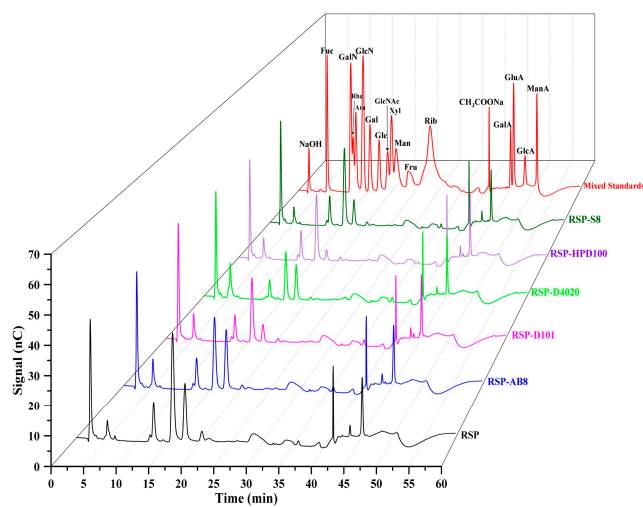

**Figure S1.** Ion chromatograms of monosaccharide standards and hydrolysates of RSP before and after decoloration with different macroporous resins.

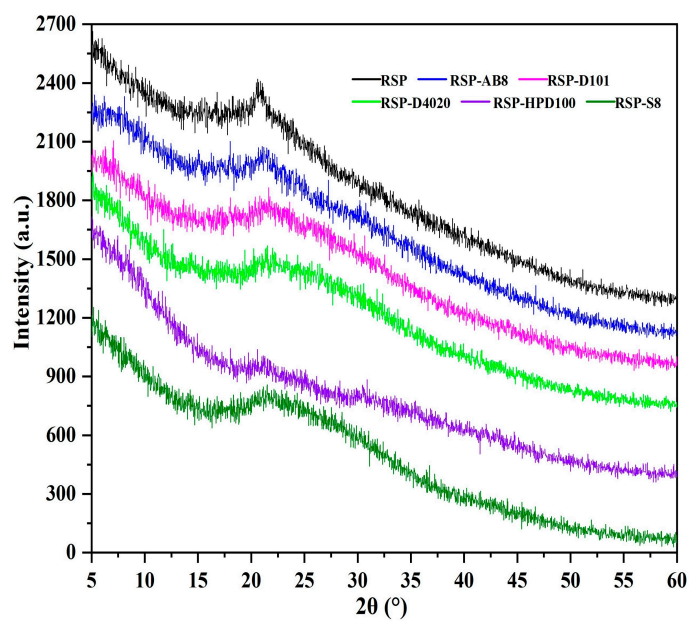

**Figure S2.** The XRD spectra of RSP before and after decoloration with different macroporous resins.

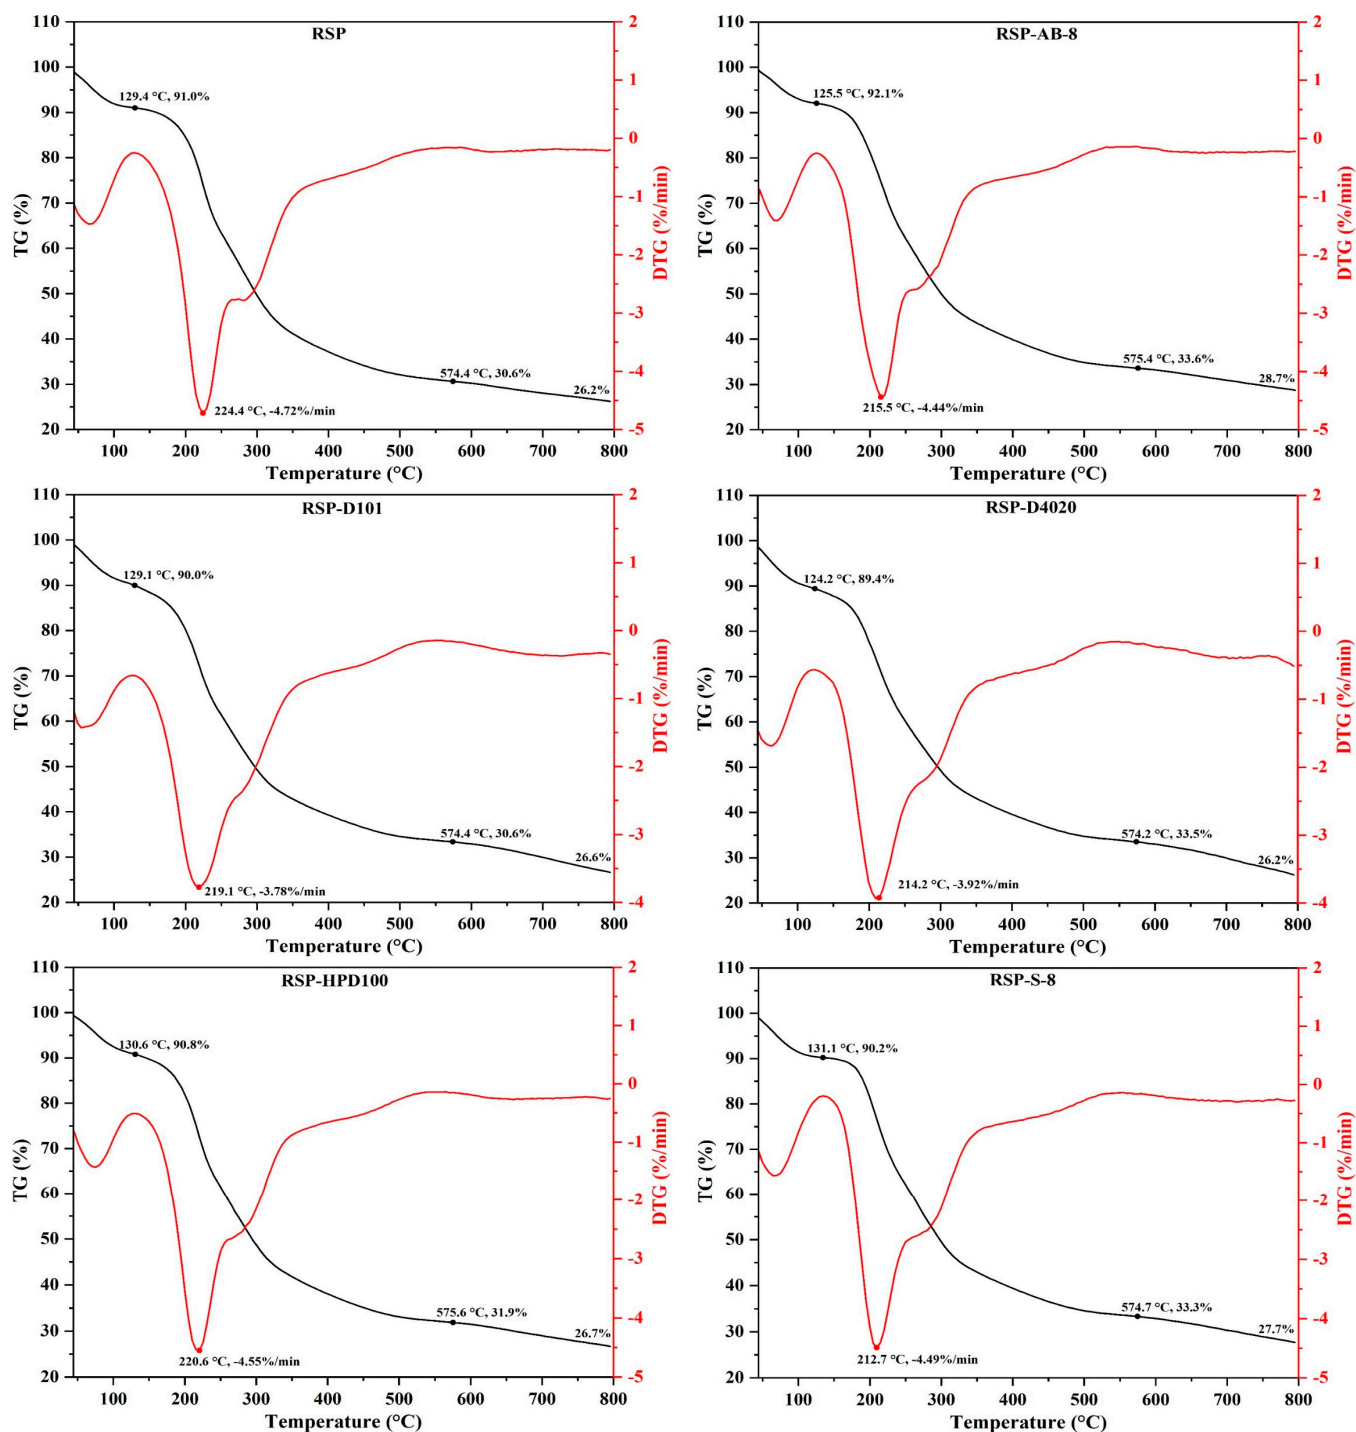

Figure S3. TG and DTG curves of RSP before and after decoloration with different macroporous resins.

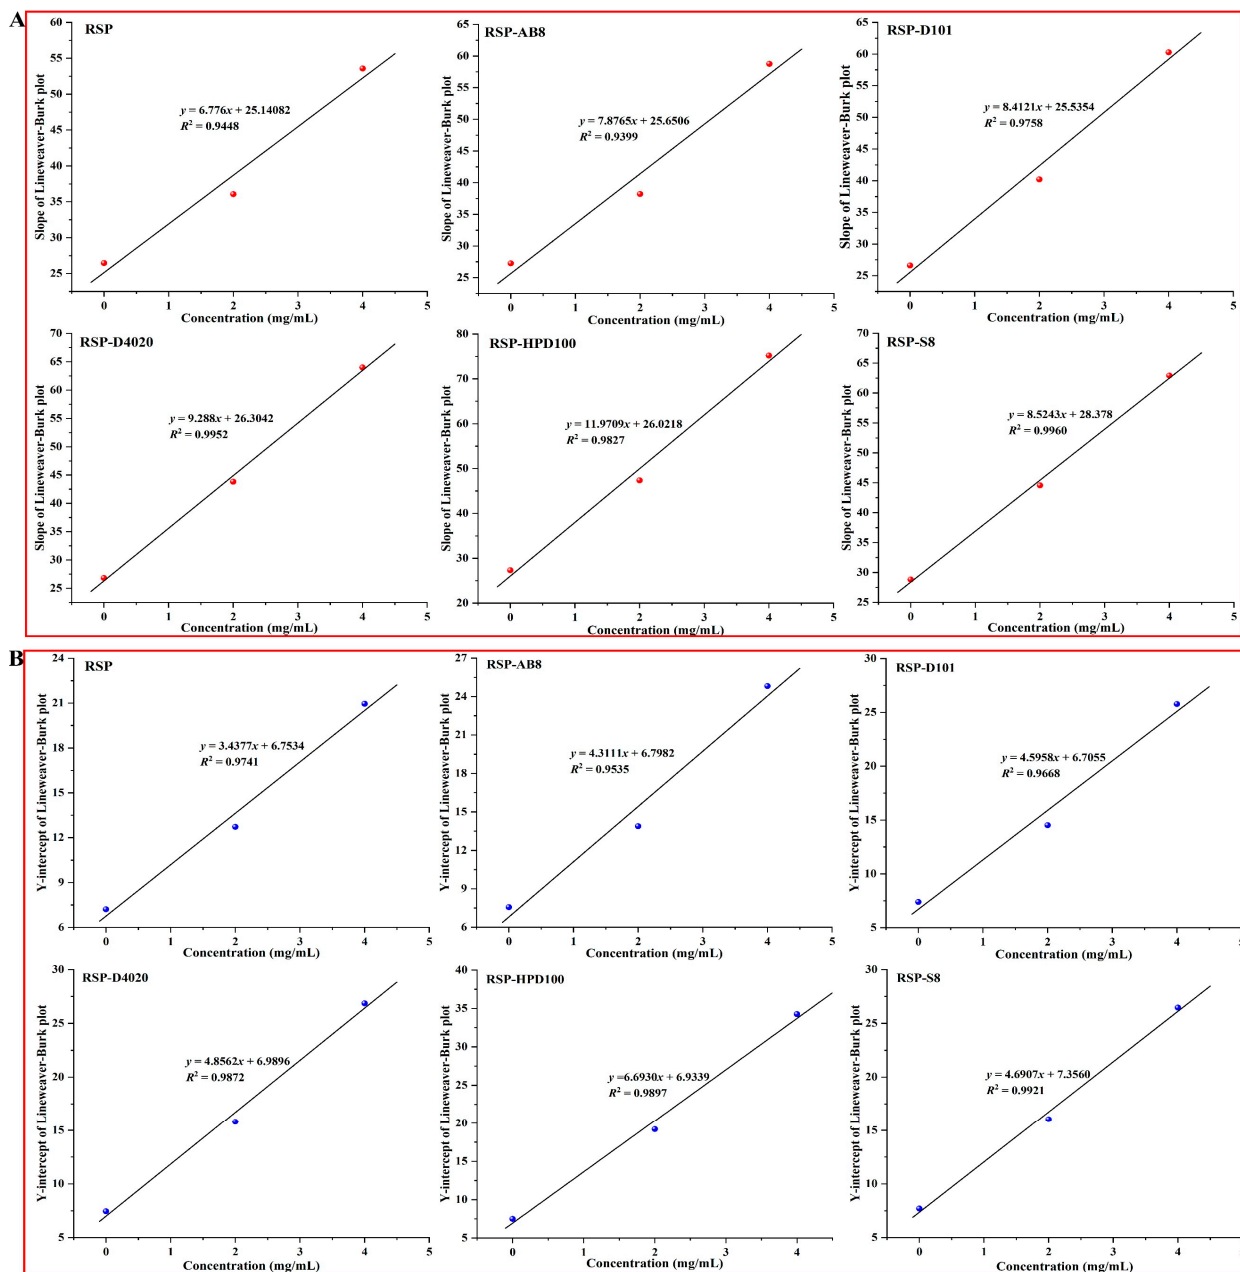

**FigureS4.** The slope of Lineweaver-Burk plot versus concentration for RSPs (A); The Y-intercept of Lineweaver-Burk plot versus concentration for RSPs (B).
